# Supplementary material for: Should coastal planners have concern over where land ice is melting?
Source: PubMed Central journal article supplement — Sci Adv. 2017 Nov 15;3(11):e1700537. doi: 10.1126/sciadv.1700537 (PMC5687855; doi:10.1126/sciadv.1700537), 2017-11-15
Supplement: 1700537_SM.pdf [file 1700537_SM.pdf]

## Supplementary Materials for

### **Should coastal planners have concern over where land ice is melting?**

Eric Larour, Erik R. Ivins, Surendra Adhikari

Published 15 November 2017, *Sci. Adv.* **3**, e1700537 (2017)

DOI: 10.1126/sciadv.1700537

#### **This PDF file includes:**

- fig. S1. Greenland basins used in Table 1.
- fig. S2. Sensitivity of SLR along the South American coastline to GrIS thickness variations.
- fig. S3. Sensitivity of SLR along the European coastline to GrIS thickness variations.
- fig. S4. Sensitivity of SLR along the African coastline to GrIS thickness.
- fig. S5. Sensitivity of SLR along the Middle East and South Asian coastlines to GrIS thickness variations.
- fig. S6. Sensitivity of SLR along the Southeast Asian coastline to GrIS thickness variations.
- fig. S7. Sensitivity of SLR along the Australian coastline to GrIS thickness variations.
- fig. S8. Sensitivity of SLR along the East Asian coastline to GrIS thickness variations.
- fig. S9. Sensitivity of SLR along the Northeast Asian and the Russian Arctic coastlines to GrIS thickness variations.
- fig. S10. Sensitivity of SLR along the Canadian Arctic coastline to GrIS thickness variations.
- fig. S11. Sensitivity of SLR along the North American coastline to AIS thickness variations.
- fig. S12. Sensitivity of SLR along the South American coastline to AIS thickness variations.
- fig. S13. Sensitivity of SLR along the European coastline to AIS thickness variations.
- fig. S14. Sensitivity of SLR along the African coastline to AIS thickness variations.

- fig. S15. Sensitivity of SLR along the Middle East and Southeast Asian coastlines to AIS thickness variations.
- fig. S16. Sensitivity of SLR along the Southeast Asian coastline to AIS thickness variations.
- fig. S17. Sensitivity of SLR along the Australian coastline to AIS thickness variations.
- fig. S18. Sensitivity of SLR along the East Asian coastline to AIS thickness variations.
- fig. S19. Sensitivity of SLR along the Northeast Asian and the Russian Arctic coastlines to AIS thickness variations.
- fig. S20. Sensitivity of SLR along the Canadian Arctic coastline to AIS thickness variations.
- fig. S21. Sensitivity of SLR for 15 reliable tide gauges around the world to GrIS thickness variations.
- fig. S22. Sensitivity of SLR for 15 reliable tide gauges around the world to AIS thickness variations.

## Supplementary Materials

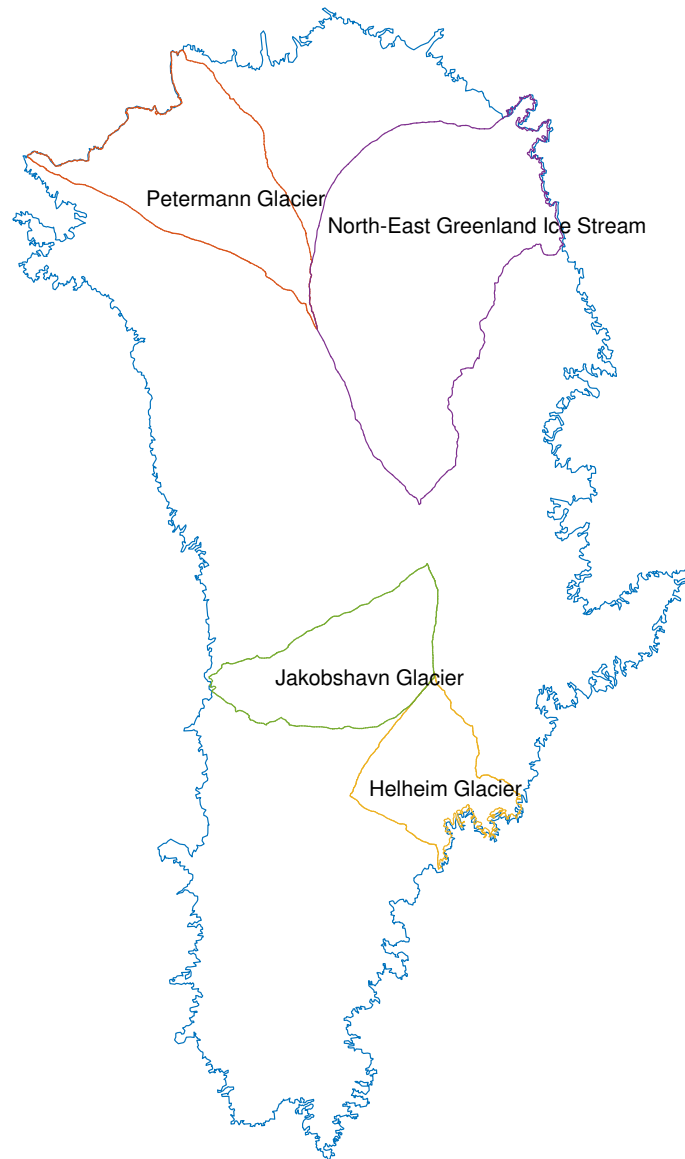

**fig. S1. Greenland basins used in Table 1.** Contours for the four Greenland basins (Petermann Glacier, North-East Greenland Ice Stream, Jakobshavn Glacier and Helheim Glacier) used in Table 1. The overall contour of Greenland is also provided for reference.

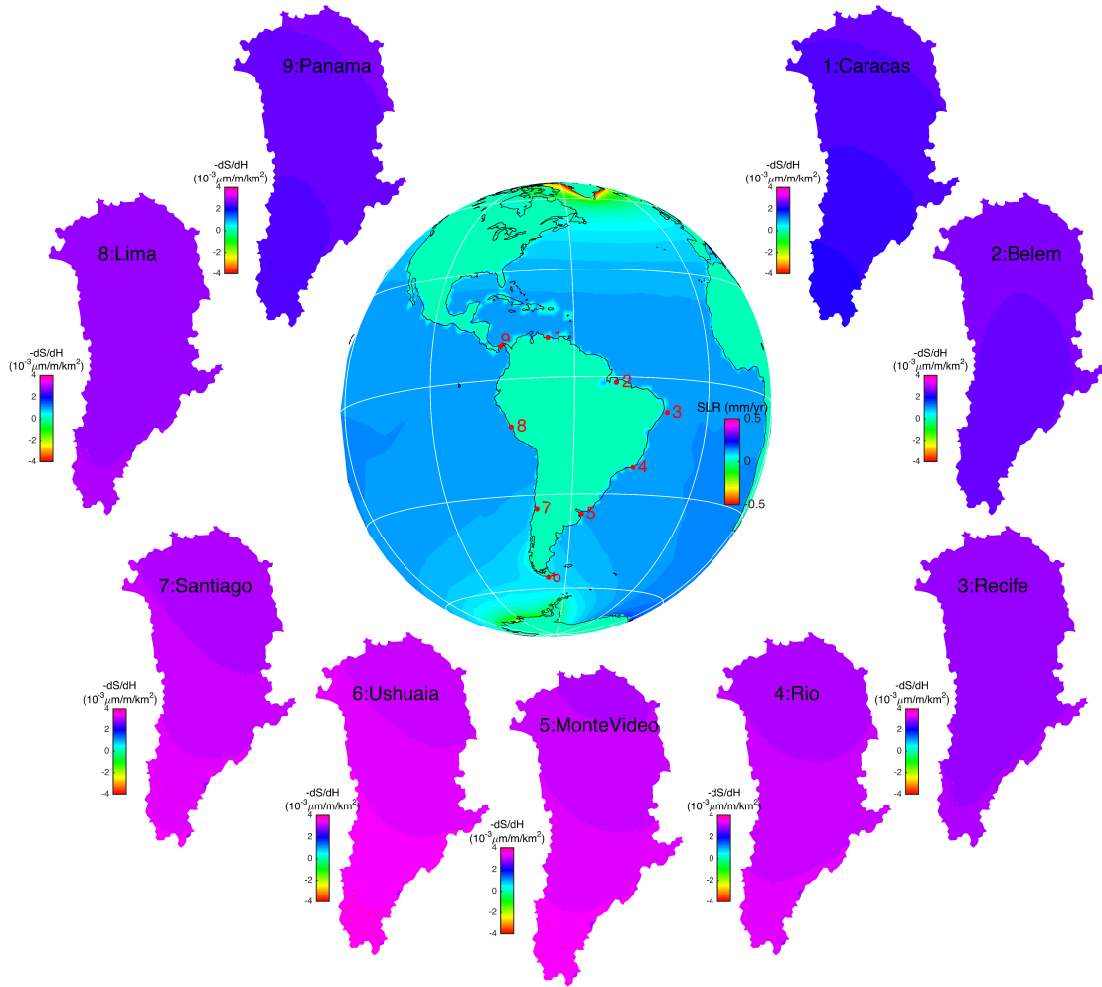

**fig. S2. Sensitivity of SLR along the South American coastline to GrIS thickness variations.** Gradient  $-dS/dH$  (in  $\mu\text{m}/\text{m}/\text{km}^2$ ) at select South-American coastal cities.

Maps 1 through 9 correspond, respectively, to gradients computed for each of the named ports numbered clockwise from Caracas. See Fig. 2 caption for a detailed explanation of how the forward run and its gradient were computed.

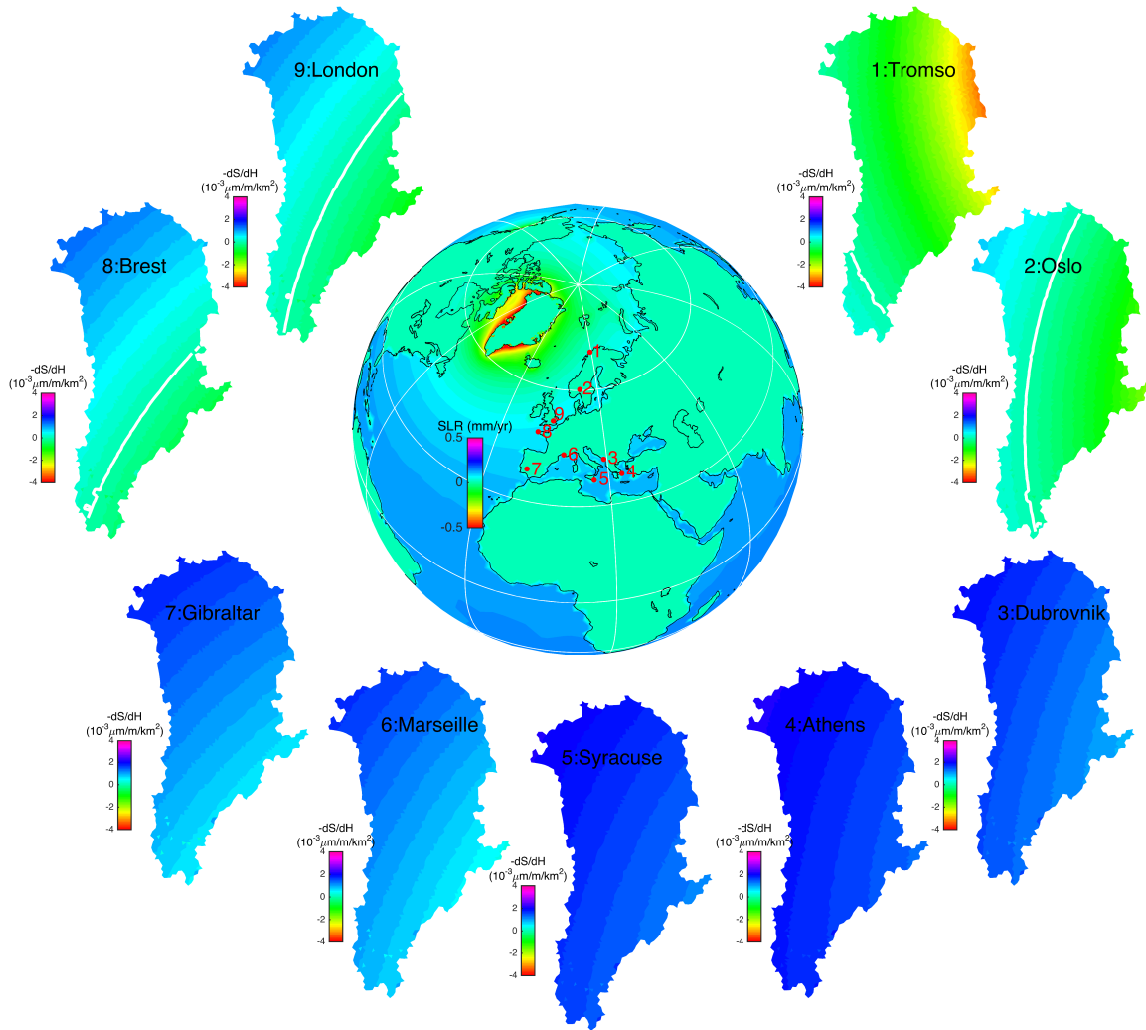

**fig. S3. Sensitivity of SLR along the European coastline to GrIS thickness**

**variations.** Gradient  $-dS/dH$  (in  $\mu\text{m}/\text{m}/\text{km}^2$ ) at select European coastal cities. Maps 1 through 9 correspond, respectively, to gradients computed for each of the named ports numbered clockwise from Tromso. The zero level for the gradient is marked by a white line. See Fig. 2 caption for a detailed explanation of how the forward run and its gradient were computed.

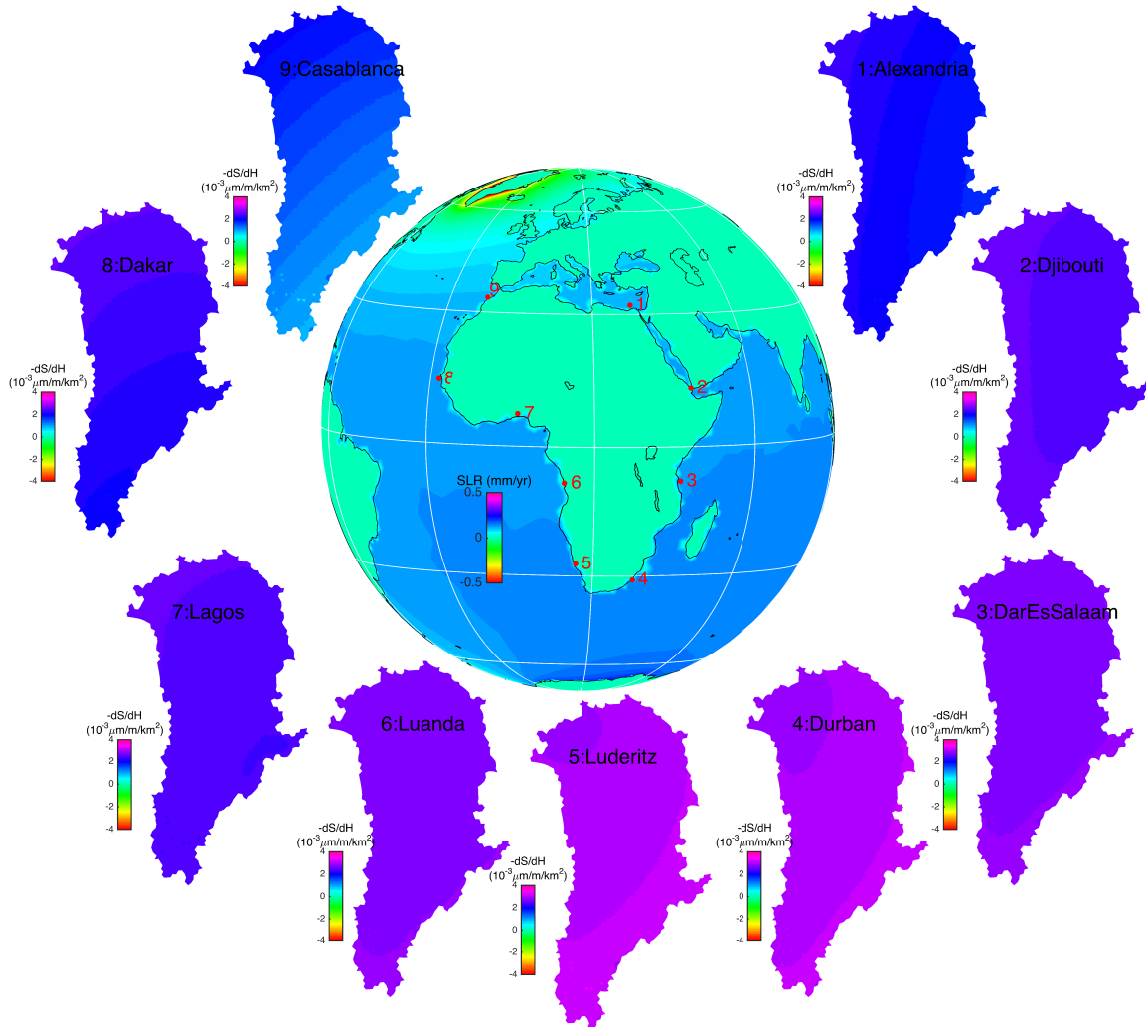

**fig. S4. Sensitivity of SLR along the African coastline to GrIS thickness.** Gradient  $-dS/dH$  (in  $\mu\text{m}/\text{m}/\text{km}^2$ ) at select African coastal cities. Maps 1 through 9 correspond, respectively, to gradients computed for each of the named ports numbered clockwise from Alexandria. See Fig. 2 caption for a detailed explanation of how the forward run and its gradient were computed.

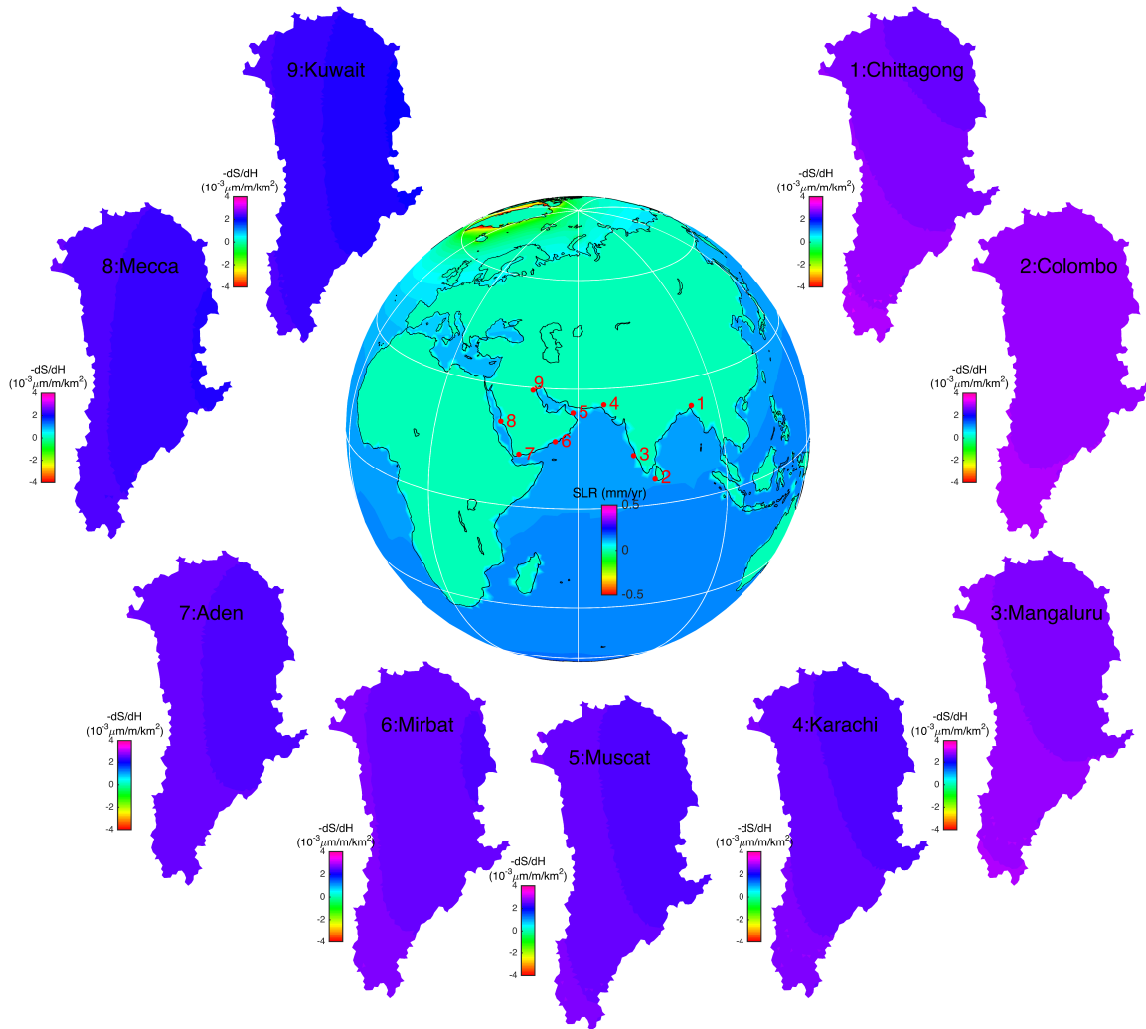

**fig. S5. Sensitivity of SLR along the Middle East and South Asian coastlines to GrIS thickness variations.** Gradient  $-dS/dH$  (in  $\mu\text{m}/\text{m}/\text{km}^2$ ) at select Middle-East and South-Asian coastal cities. Maps 1 through 9 correspond, respectively, to gradients computed for each of the named ports numbered clockwise from Chittagong. See Fig. 2 caption for a detailed explanation of how the forward run and its gradient were computed.

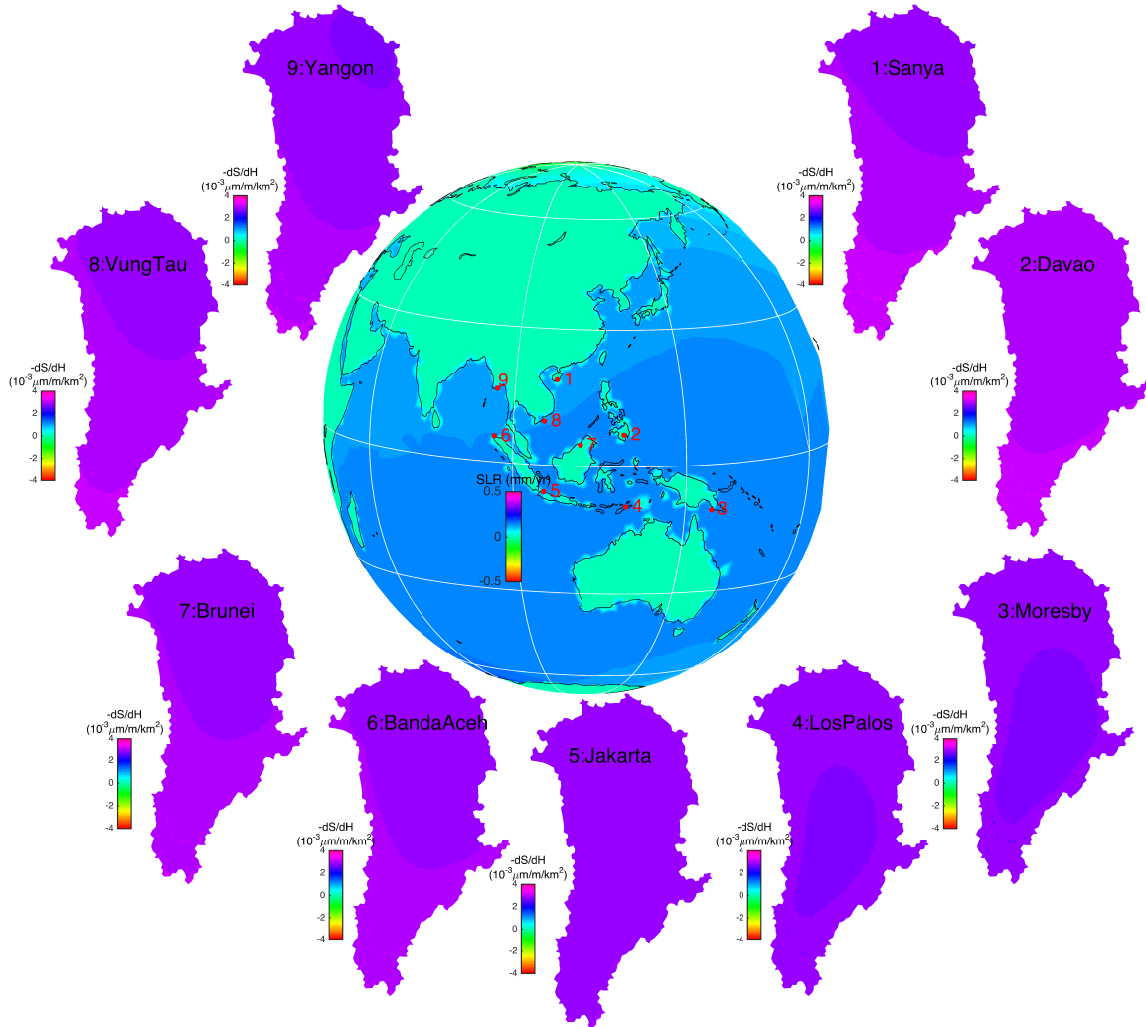

**fig. S6. Sensitivity of SLR along the Southeast Asian coastline to GrIS thickness variations.** Gradient  $-dS/dH$  (in  $\mu\text{m}/\text{m}/\text{km}^2$ ) at select South-East Asian coastal cities. Maps 1 through 9 correspond, respectively, to gradients computed for each of the named ports numbered clockwise from Sanya. See Fig. 2 caption for a detailed explanation of how the forward run and its gradient were computed.



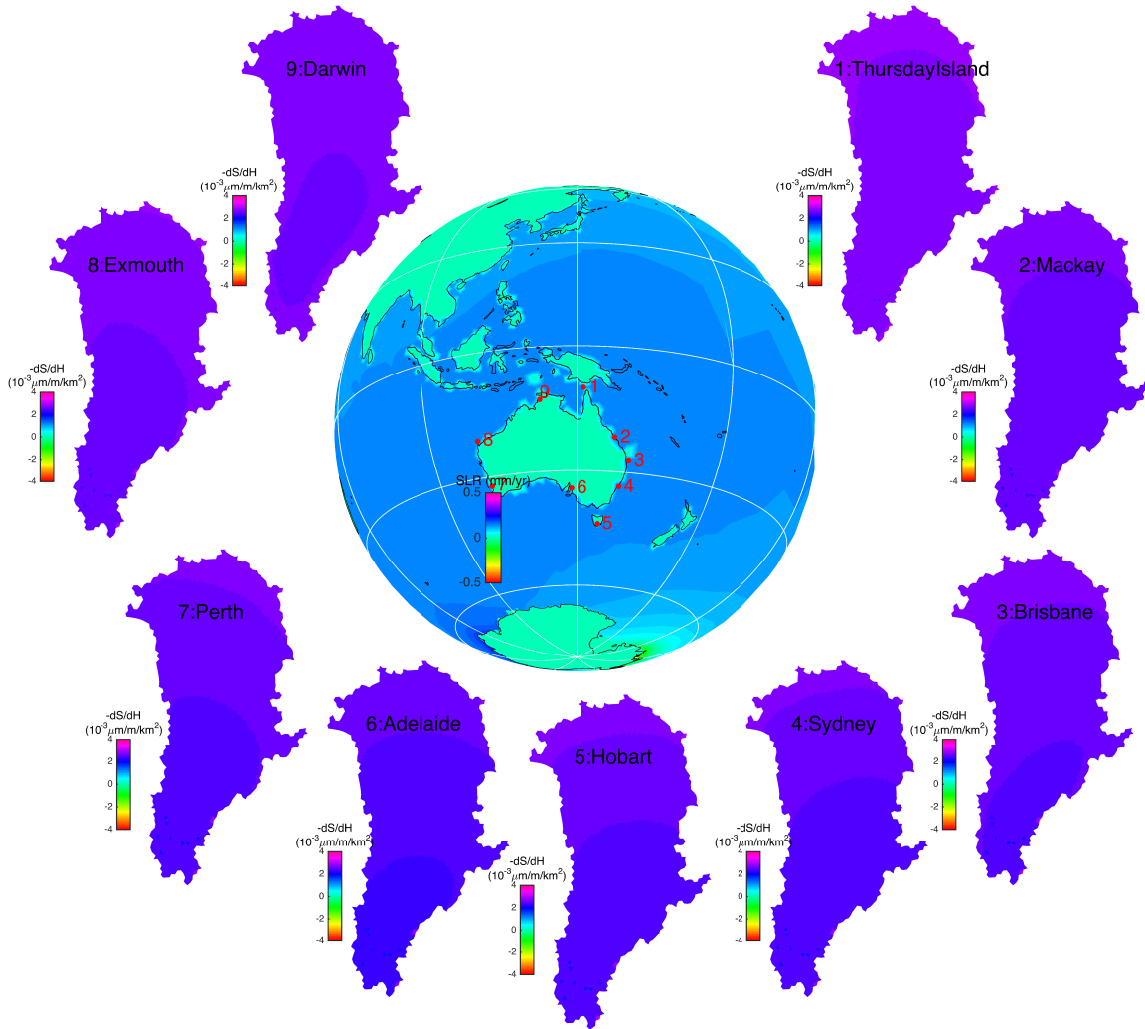

**fig. S7. Sensitivity of SLR along the Australian coastline to GrIS thickness**

**variations.** Gradient  $-dS/dH$  (in  $\mu\text{m}/\text{m}/\text{km}^2$ ) at select Australian coastal cities. Maps 1 through 9 correspond, respectively, to gradients computed for each of the named ports numbered clockwise from Thursday Island. See Fig. 2 caption for a detailed explanation of how the forward run and its gradient were computed.

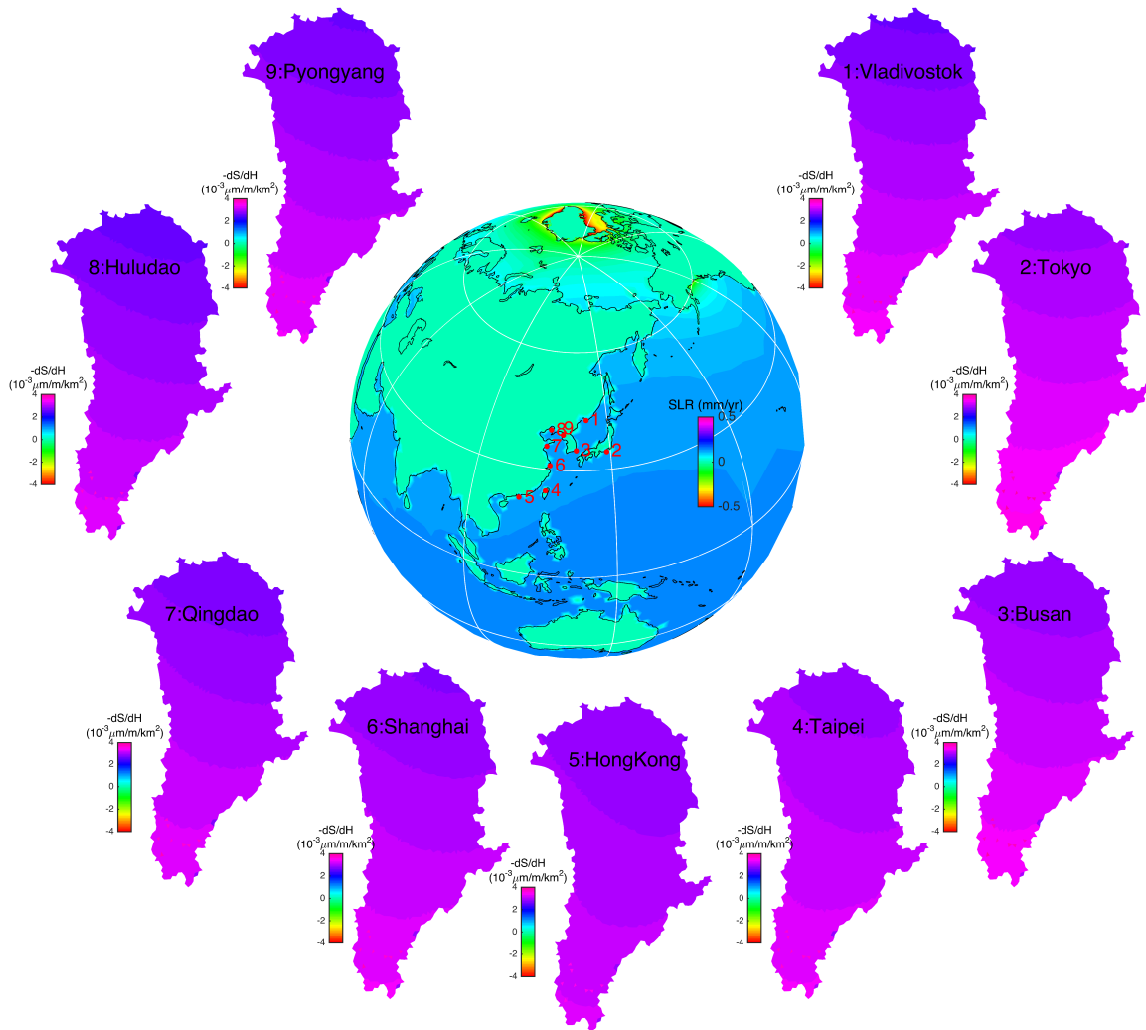

**fig. S8. Sensitivity of SLR along the East Asian coastline to GrIS thickness**

**variations.** Gradient  $-dS/dH$  (in  $\mu\text{m}/\text{m}/\text{km}^2$ ) at select East-Asian coastal cities. Maps 1 through 9 correspond, respectively, to gradients computed for each of the named ports numbered clockwise from Vladivostok. See Fig. 2 caption for a detailed explanation of how the forward run and its gradient were computed.

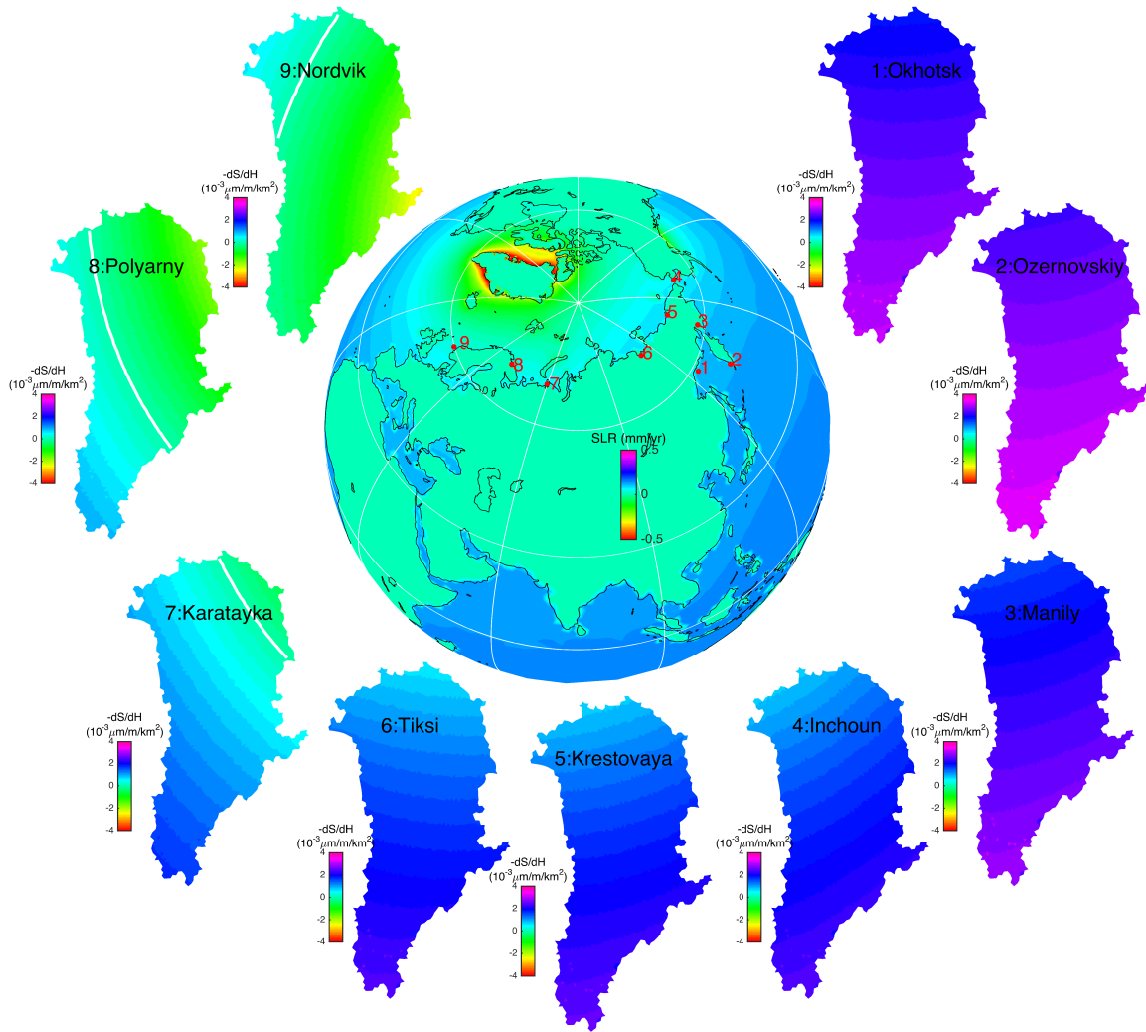

**fig. S9. Sensitivity of SLR along the Northeast Asian and the Russian Arctic coastlines to GrIS thickness variations.** Gradient  $-dS/dH$  (in  $\mu\text{m}/\text{m}/\text{km}^2$ ) at select North-East Asian and Russian Arctic coastal cities. Maps 1 through 9 correspond, respectively, to gradients computed for each of the named ports numbered clockwise from Okhotsk. The zero level for the gradient is marked by a white line. See Fig. 2 caption for a detailed explanation of how the forward run and its gradient were computed.

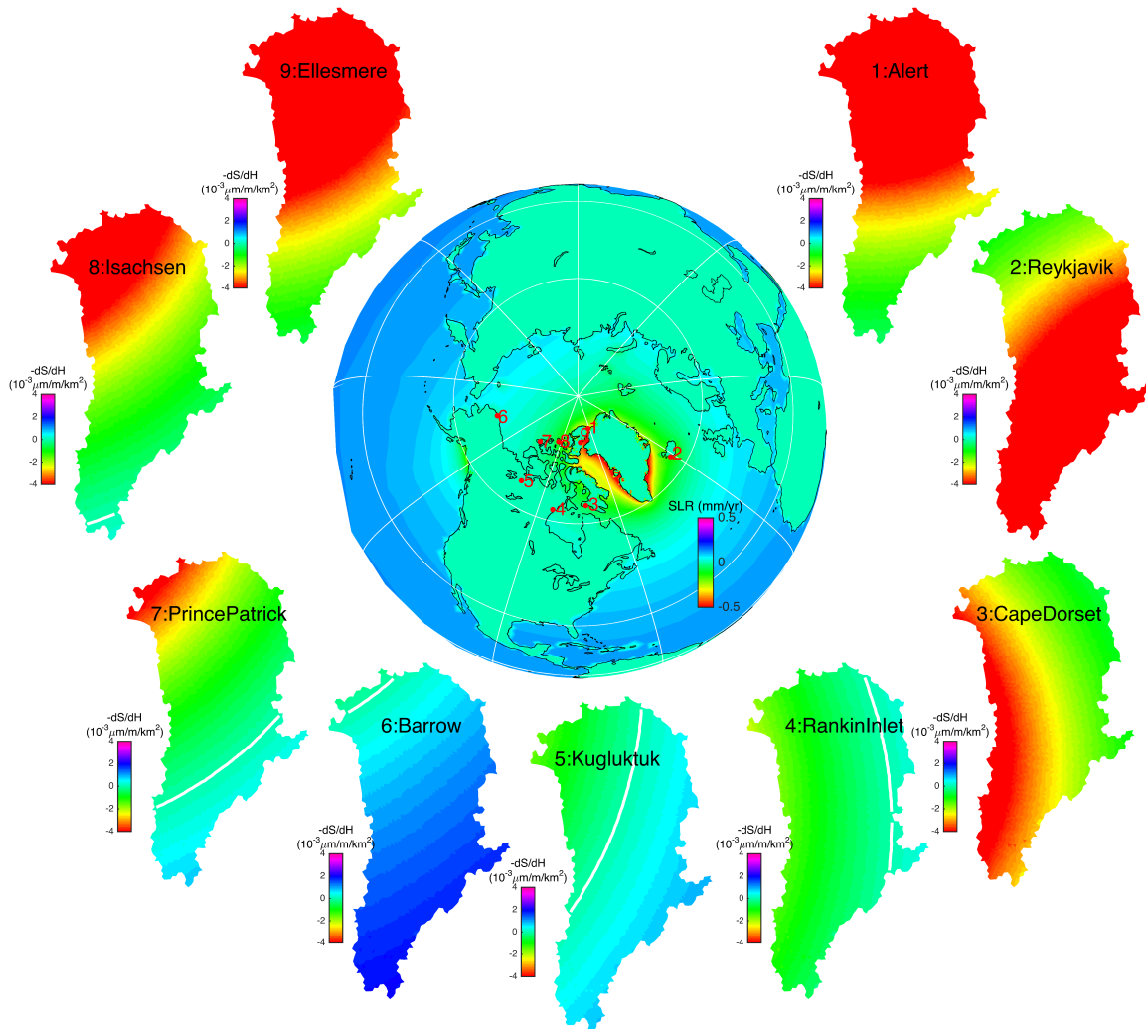

**fig. S10. Sensitivity of SLR along the Canadian Arctic coastline to GrIS thickness**

**variations.** Gradient  $-dS/dH$  (in  $\mu\text{m}/\text{m}/\text{km}^2$ ) at select Canadian Arctic coastal cities.

Maps 1 through 9 correspond, respectively, to gradients computed for each of the named ports numbered clockwise from Alert. A white line marks the zero level for the gradient.

See Fig. 2 caption for a detailed explanation of how the forward run and its gradient were computed.

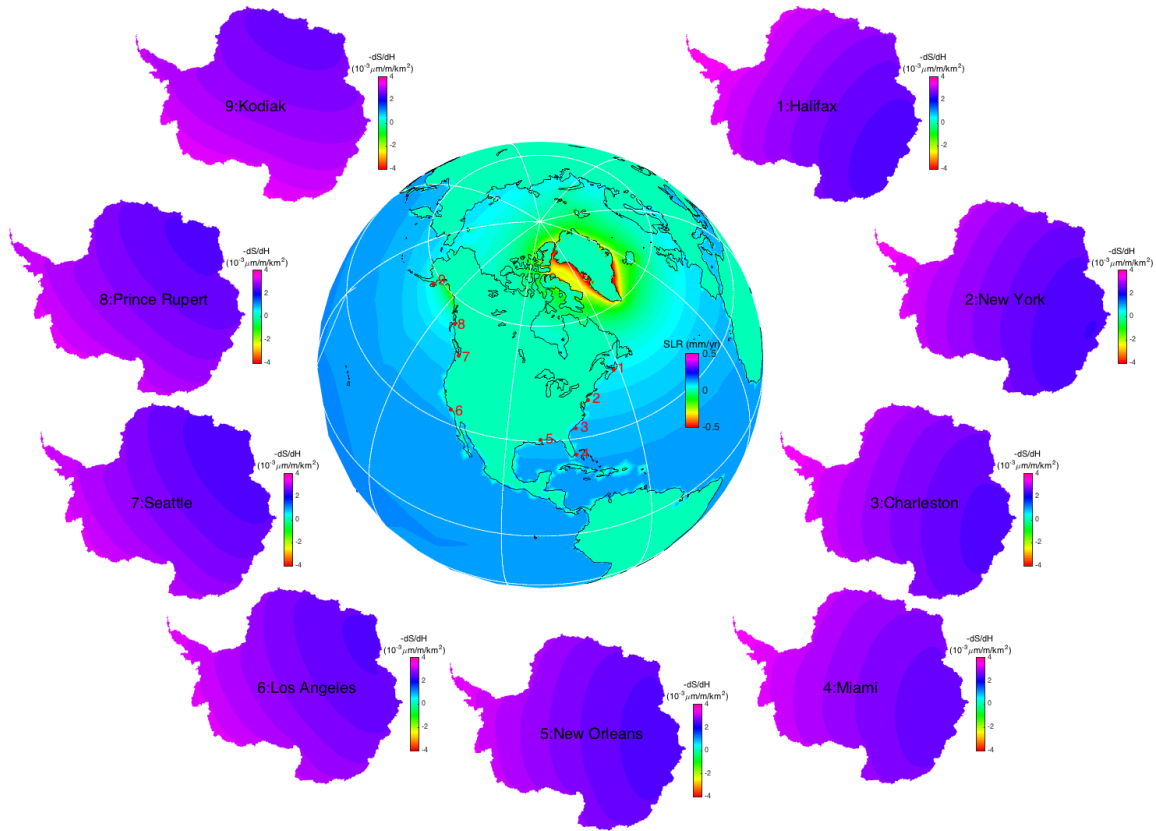

**fig. S11. Sensitivity of SLR along the North American coastline to AIS thickness variations.** Gradient  $-dS/dH$  (in  $\mu\text{m}/\text{m}/\text{km}^2$ ) at select North-American coastal cities. Maps 1 through 9 correspond, respectively, to gradients computed for each of the named ports numbered clockwise from Halifax. See Fig. 2 caption for a detailed explanation of how the forward run and its gradient were computed.

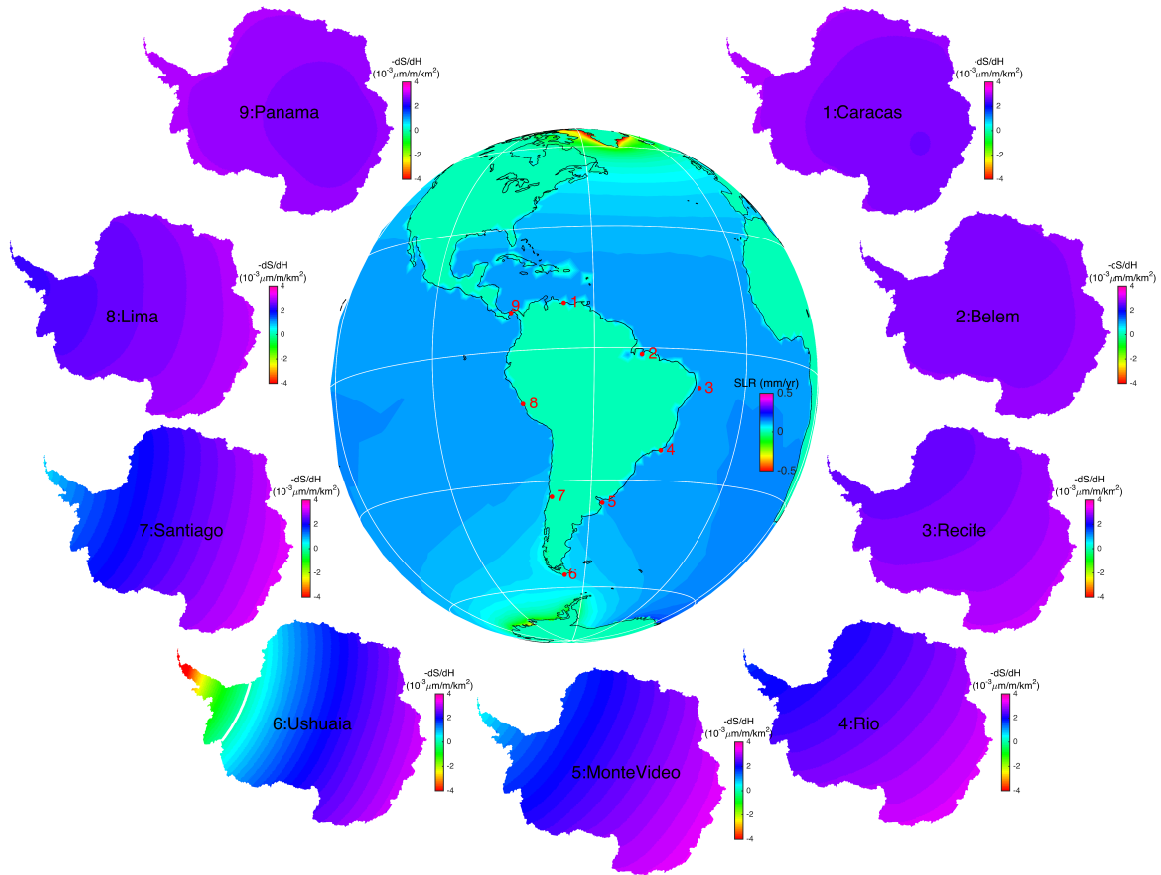

**fig. S12. Sensitivity of SLR along the South American coastline to AIS thickness variations.** Gradient  $-dS/dH$  (in  $\mu\text{m}/\text{m}/\text{km}^2$ ) at select South-American coastal cities. Maps 1 through 9 correspond, respectively, to gradients computed for each of the named ports numbered clockwise from Caracas. A white line marks the zero level for the gradient. See Fig. 2 caption for a detailed explanation of how the forward run and its gradient were computed.

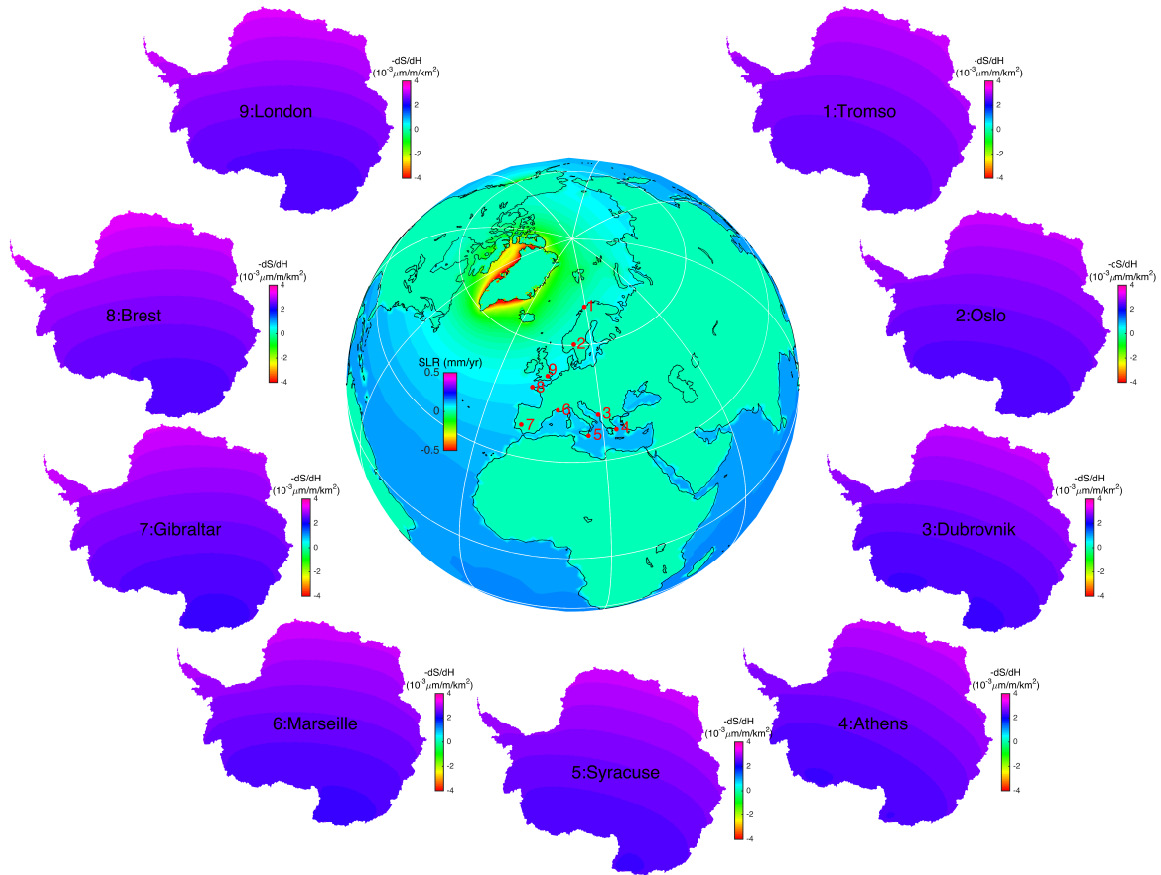

**Fig. S13. Sensitivity of SLR along the European coastline to AIS thickness**

**variations.** Gradient  $-dS/dH$  (in  $\mu\text{m}/\text{m}/\text{km}^2$ ) at select European coastal cities. Maps 1 through 9 correspond, respectively, to gradients computed for each of the named ports numbered clockwise from Tromso. See Fig. 2 caption for a detailed explanation of how the forward run and its gradient were computed.

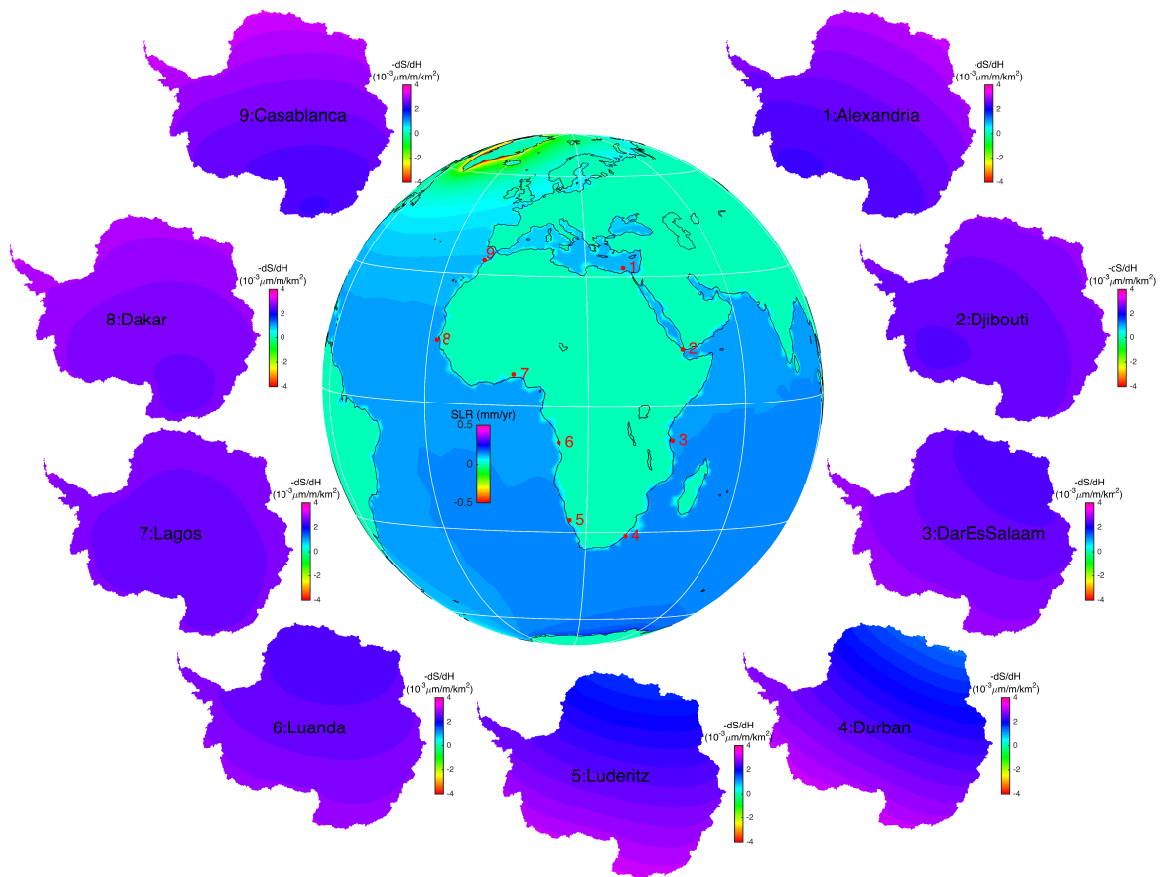

**fig. S14. Sensitivity of SLR along the African coastline to AIS thickness variations.**

Gradient  $-dS/dH$  (in  $\mu\text{m}/\text{m}/\text{km}^2$ ) at select African coastal cities. Maps 1 through 9 correspond, respectively, to gradients computed for each of the named ports numbered clockwise from Alexandria. See Fig. 2 caption for a detailed explanation of how the forward run and its gradient were computed.



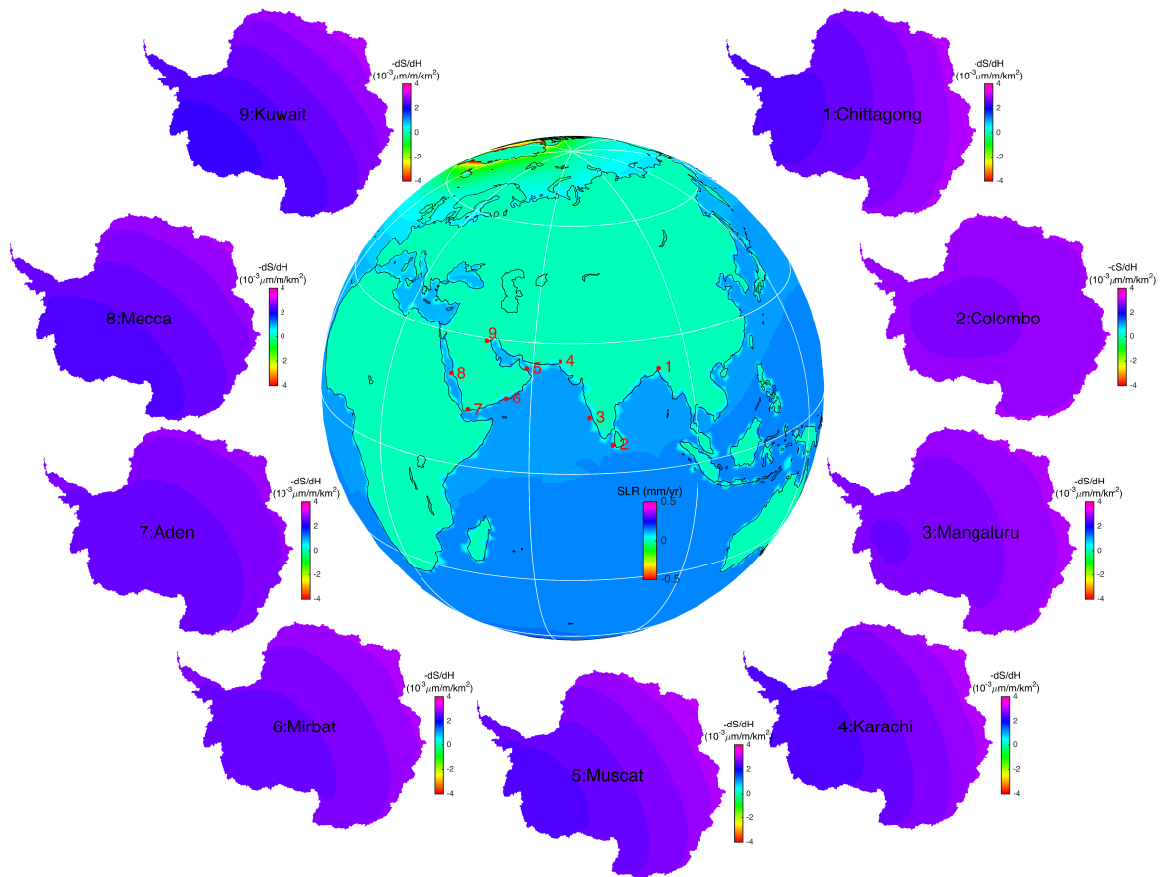

**fig. S15. Sensitivity of SLR along Middle East and Southeast Asian coastlines to AIS thickness variations.** Gradient  $-dS/dH$  (in  $\mu\text{m}/\text{m}/\text{km}^2$ ) at select Middle-East and South-East Asian coastal cities. Maps 1 through 9 correspond, respectively, to gradients computed for each of the named ports numbered clockwise from Chittagong. See Fig. 2 caption for a detailed explanation of how the forward run and its gradient were computed.

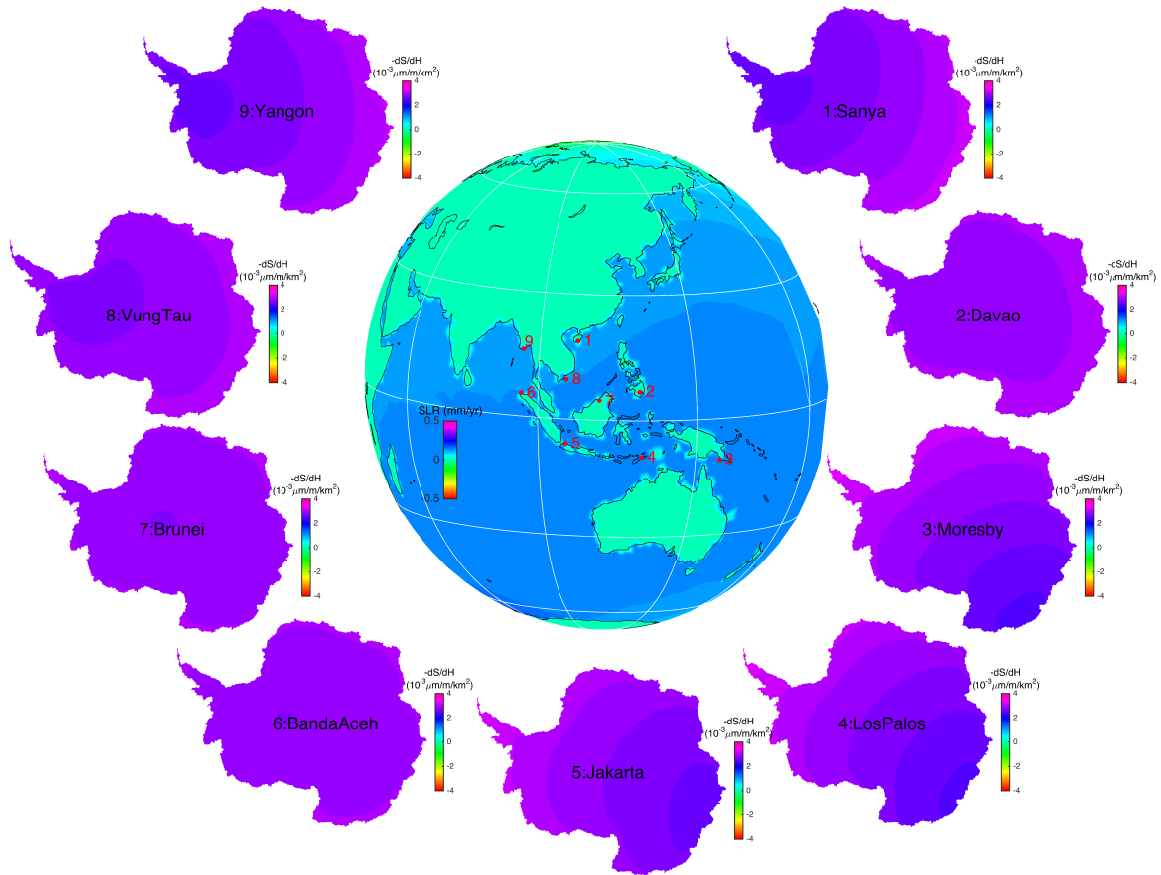

**fig. S16. Sensitivity of SLR along the Southeast Asian coastline to AIS thickness variations.** Gradient  $-dS/dH$  ((in  $\mu\text{m}/\text{m}/\text{km}^2$ ) at select South-East Asian coastal cities. Maps 1 through 9 correspond, respectively, to gradients computed for each of the named ports numbered clockwise from Sanya. See Fig. 2 caption for a detailed explanation of how the forward run and its gradient were computed.

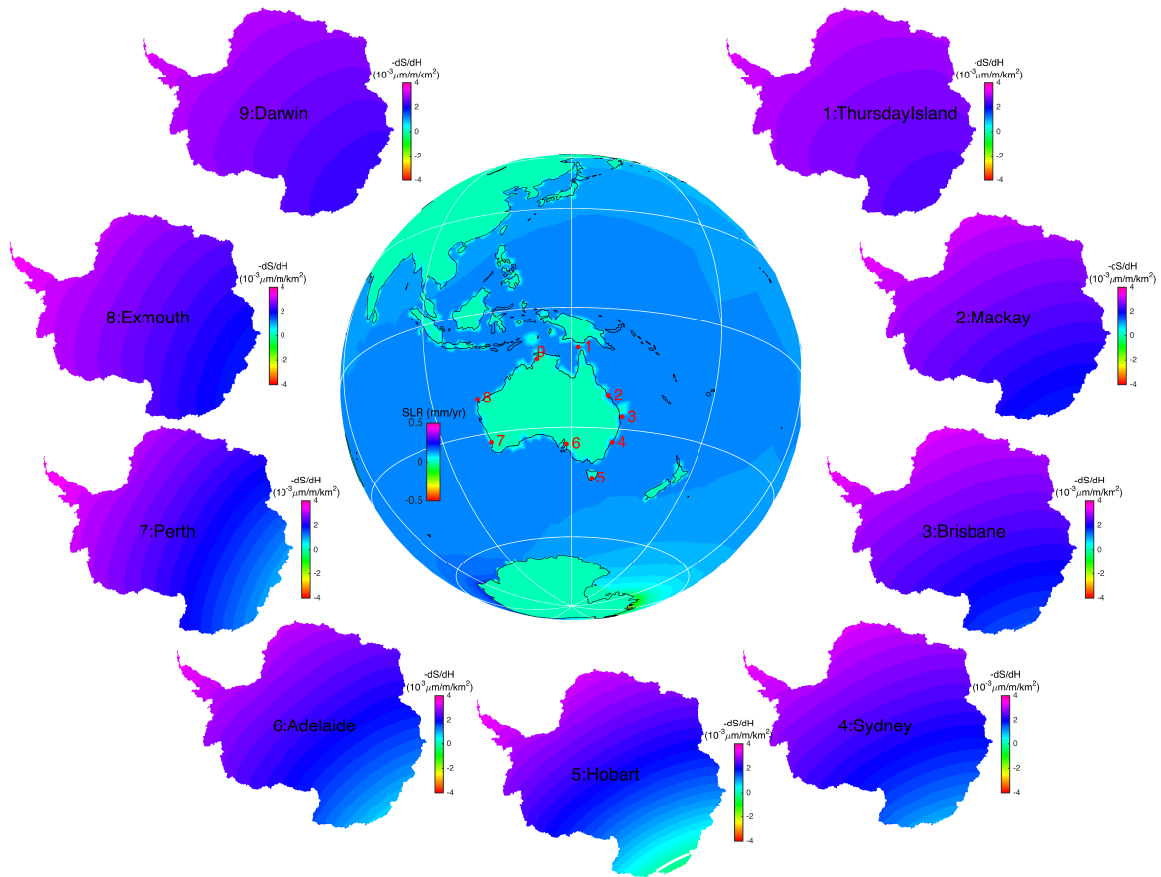

**fig. S17. Sensitivity of SLR along the Australian coastline to AIS thickness variations.** Gradient  $-dS/dH$  (in  $\mu\text{m}/\text{m}/\text{km}^2$ ) at select Australian coastal cities. Maps 1 through 9 correspond, respectively, to gradients computed for each of the named ports numbered clockwise from Thursday Island. A white line marks the zero level for the gradient. See Fig. 2 caption for a detailed explanation of how the forward run and its gradient were computed.

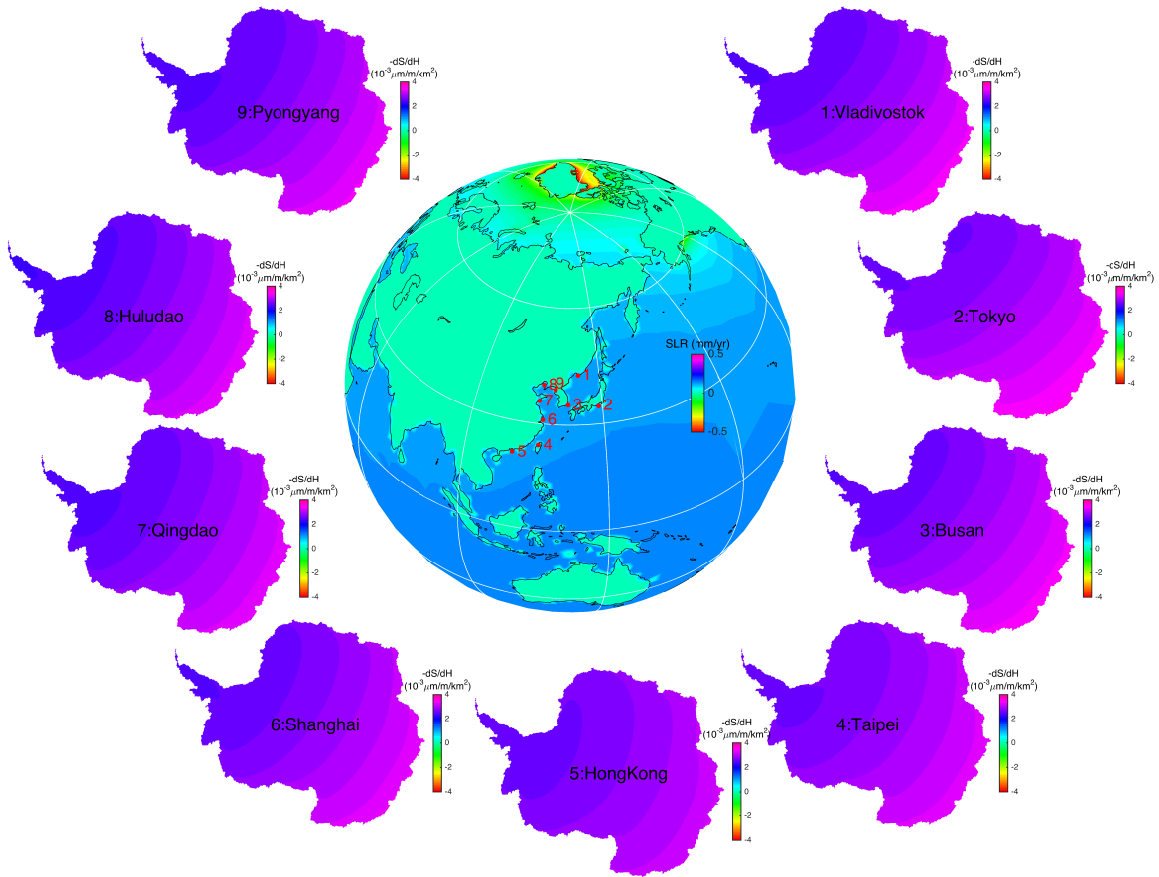

**fig. S18. Sensitivity of SLR along the East Asian coastline to AIS thickness variations.** Gradient  $-dS/dH$  (in  $\mu\text{m}/\text{m}/\text{km}^2$ ) at select East-Asian coastal cities. Maps 1 through 9 correspond, respectively, to gradients computed for each of the named ports numbered clockwise from Vladivostok. See Fig. 2 caption for a detailed explanation of how the forward run and its gradient were computed.

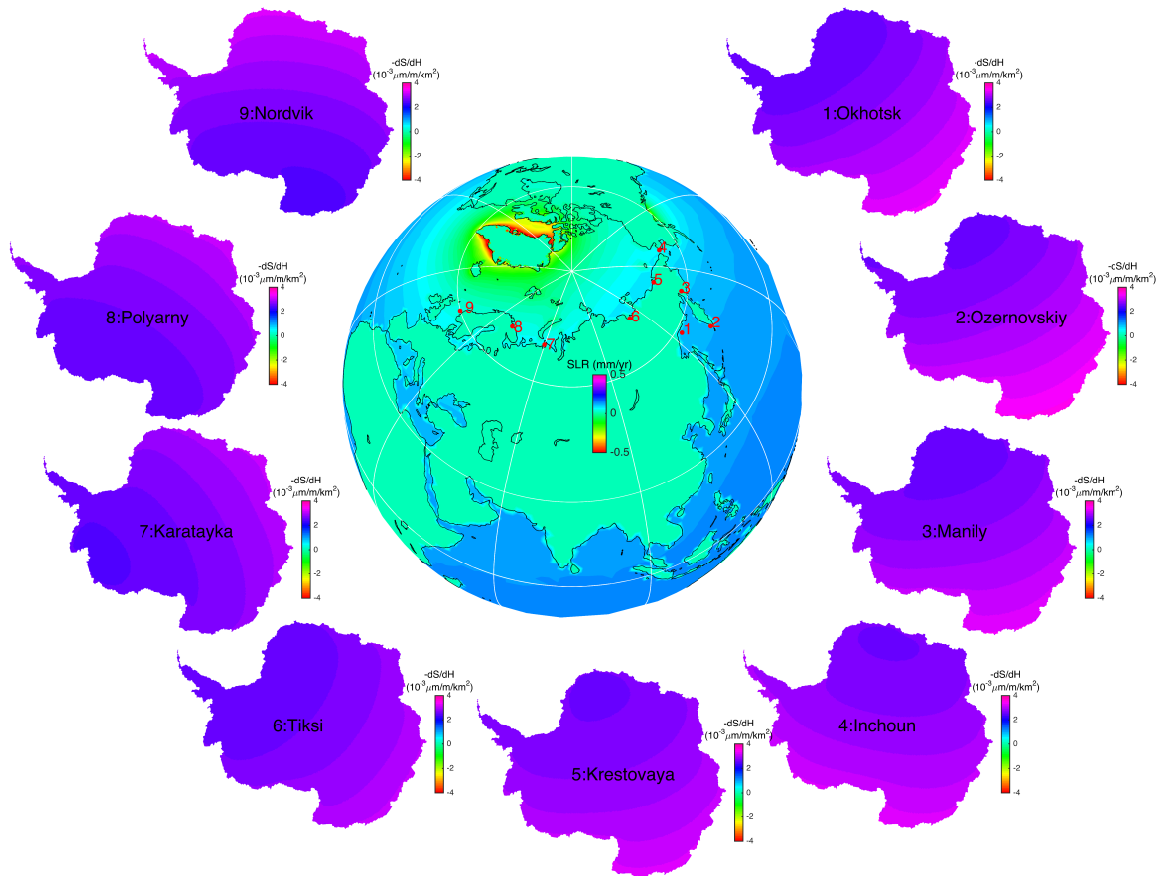

**fig. S19. Sensitivity of SLR along the Northeast Asian and the Russian Arctic coastlines to AIS thickness variations.** Gradient  $-dS/dH$  (in  $\mu\text{m}/\text{m}/\text{km}^2$ ) at select North-East Asian and Russian Arctic coastal cities. Maps 1 through 9 correspond, respectively, to gradients computed for each of the named ports numbered clockwise from Okhotsk. See Fig. 2 caption for a detailed explanation of how the forward run and its gradient were computed.

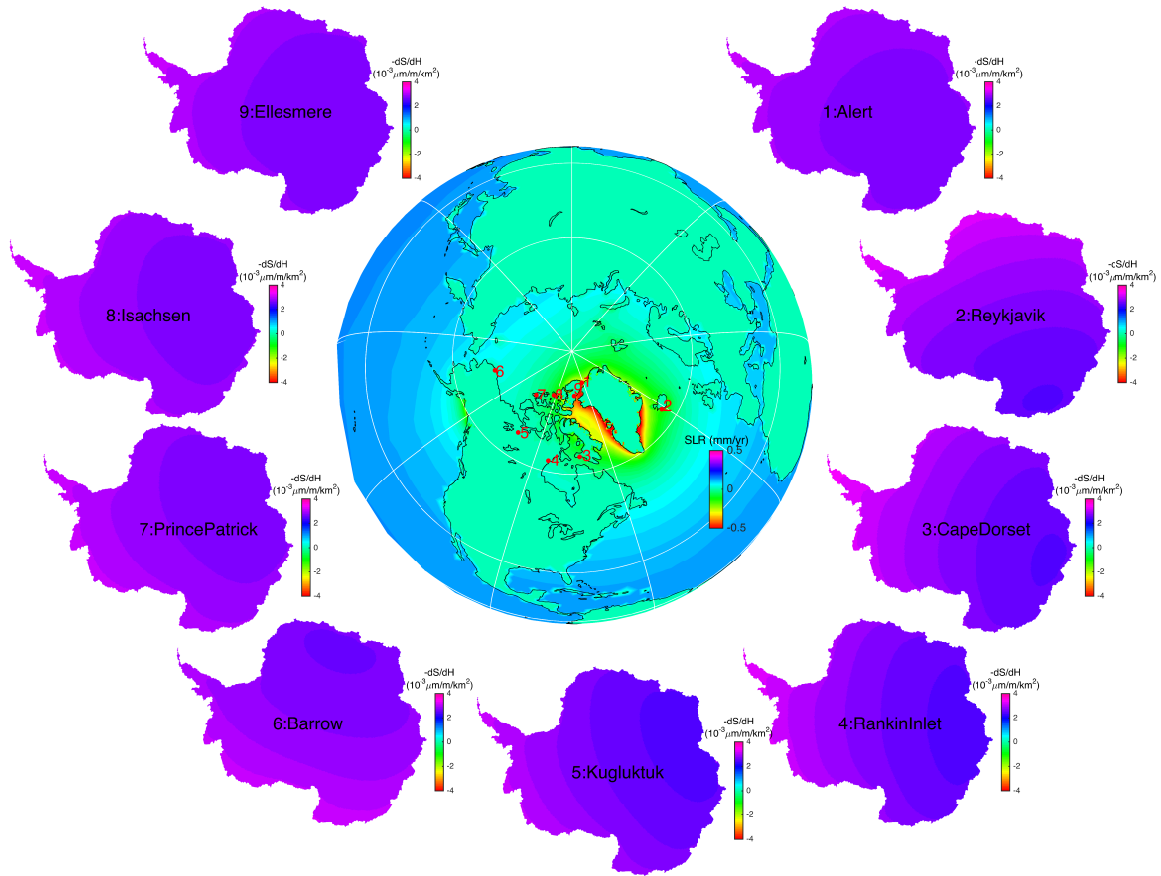

**fig. S20. Sensitivity of SLR along the Canadian Arctic coastline to AIS thickness variations.** Gradient  $-dS/dH$  (in  $\mu\text{m}/\text{m}/\text{km}^2$ ) at select Canadian Arctic coastal cities. Maps 1 through 9 correspond, respectively, to gradients computed for each of the named ports numbered clockwise from Alert. See Fig. 2 caption for a detailed explanation of how the forward run and its gradient were computed.

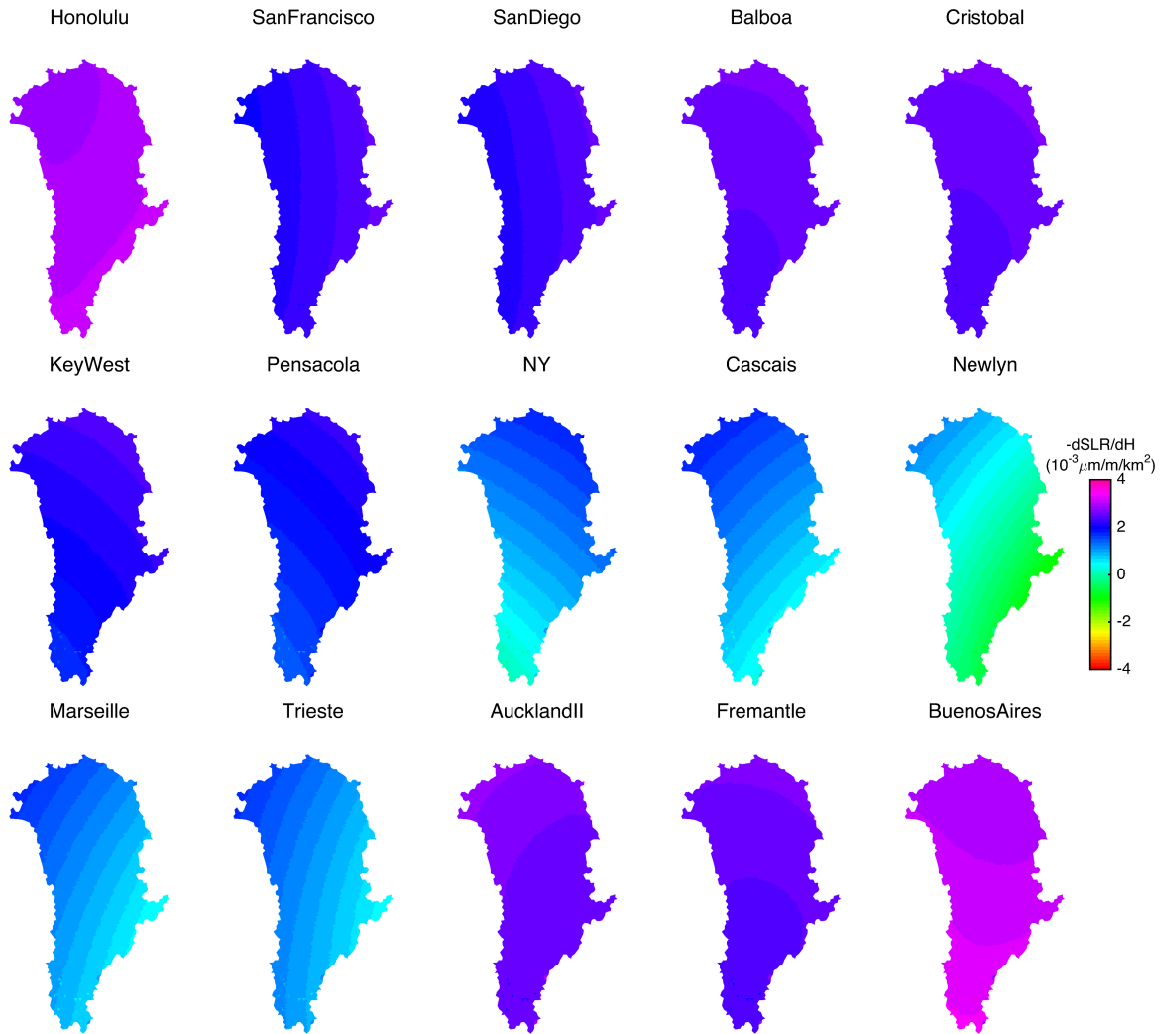

**fig. S21. Sensitivity of SLR for 15 reliable tide gauges around the world to GrIS thickness variations.** Gradient  $-\frac{dS}{dH}$  (in  $\mu\text{m}/\text{m}/\text{km}^2$ ) in Greenland for the 15 tide gauges defined in (32). See Fig. 2 caption for a detailed explanation of how the forward run and its gradient were computed.

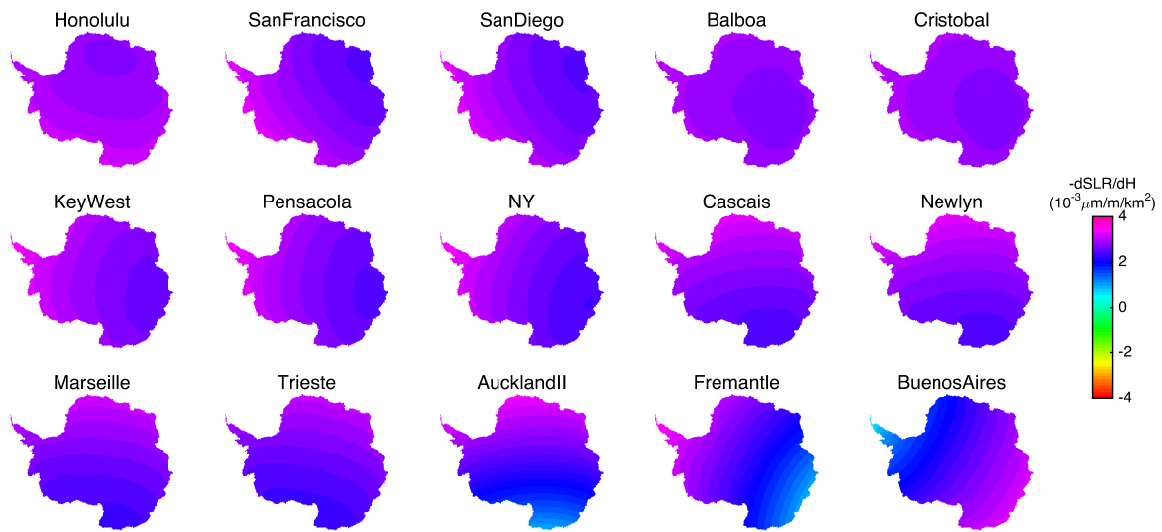

**fig. S22. Sensitivity of SLR for 15 reliable tide gauges around the world to AIS thickness variations.** Gradient  $-dS/dH$  (in  $\mu\text{m}/\text{m}/\text{km}^2$ ) in Antarctica for the 15 tide gauges defined in (32). See Fig. 2 caption for a detailed explanation of how the forward run and its gradient were computed.
